# Supplementary material
Source: HighWire-hosted journal article supplement (https://bmjopen.bmj.com/content/9/10/e029143)
Supplement: inline-supplementary-material-1 [file inline-supplementary-material-1.pdf]

**Appendix 1 – Example Search Strategy (1<sup>st</sup> January 2000 to 28<sup>th</sup> January 2018)**

1. exp Urinary Tract Infections/ or exp lower urinary tract symptoms/ or exp hematuria/ or exp polyuria/ or exp nocturia/ or h?ematuri\*.ti,ab. Or dysuri\*.ti,ab. Or (nocturi\* or nycturi\*).ti,ab. Or polyuri\*.ti,ab. Or exp Urinary Incontinence/ or (urinary adj3 incontinen\*).ti,ab. Or (urin\* adj3 (frequen\* or urgen\*).ti,ab. Or (urin\* adj3 infect\*).ti,ab. – 379274
2. exp Kidney Neoplasms/ or ((Kidney or renal) adj3 (cancer or neoplas\* or tumo?r or carcinoma\*).ti,ab. – 213088
3. exp Urinary Bladder Neoplasms/ or (bladder adj3 (cancer or neoplas\* or tumo?r or carcinoma\*).ti,ab. – 145154
4. #2 OR #3 – 346524
5. #1 AND #4 – 20778
6. limit #5 to (humans and yr="2000-Current") – 12950
7. limit #7 to "all adult (19 plus years)" [Limit not valid in Embase; records were retained] – 12268
8. limit #8 to ("all adult (19 plus years)" or "adolescent (13 to 18 years)") [Limit not valid in Embase; records were retained] – 12268
9. limit #6 to (adult <18 to 64 years> or aged <65+ years>) [Limit not valid in Ovid MEDLINE(R),Ovid MEDLINE(R) Daily Update,Ovid MEDLINE(R) In-Process,Ovid MEDLINE(R) Publisher; records were retained] – 8253

**Cochrane Library Search Strategy (inception to 13<sup>th</sup> June 2019)**

|     |                                                                   |        |
|-----|-------------------------------------------------------------------|--------|
| #1  | MeSH descriptor: [Kidney Neoplasms] explode all trees             | 1046   |
| #2  | MeSH descriptor: [Urinary Bladder Neoplasms] explode all trees    | 1356   |
| #3  | MeSH descriptor: [Diagnosis] explode all trees                    | 315302 |
| #4  | MeSH descriptor: [Urinary Tract Infections] explode all trees     | 2370   |
| #5  | MeSH descriptor: [Lower Urinary Tract Symptoms] explode all trees | 2777   |
| #6  | MeSH descriptor: [Hematuria] 2 tree(s) exploded                   | 177    |
| #7  | #1 OR #2                                                          | 2371   |
| #8  | #4 OR #5 OR #6                                                    | 5223   |
| #9  | #7 AND #8                                                         | 37     |
| #10 | #9 AND #3                                                         | 17     |
