# Supplementary material
Source: HighWire-hosted journal article supplement (https://bmjopen.bmj.com/content/9/10/e029143)
Supplement: inline-supplementary-material-2 [file inline-supplementary-material-2.pdf]

## Appendix 2: Reported percentages of diagnostic tests and urological referrals for patients with hematuria

| Study                                                     | Type of hematuria <sup>a</sup> | No evaluation (%) | Frequency of different evaluations and referrals performed (%) |               |                |         |            |                             |          |                                 |
|-----------------------------------------------------------|--------------------------------|-------------------|----------------------------------------------------------------|---------------|----------------|---------|------------|-----------------------------|----------|---------------------------------|
|                                                           |                                |                   | History/Exam                                                   | Urine Culture | Urine Cytology | Imaging | Cystoscopy | Both Imaging and cystoscopy | Referral | Guideline concordant evaluation |
| <b>Performed within 30 days</b>                           |                                |                   |                                                                |               |                |         |            |                             |          |                                 |
| Matulewicz                                                | NVH                            |                   |                                                                |               |                | 7.7     | 3.6        | 1.4                         |          |                                 |
| <b>Performed within 60 days</b>                           |                                |                   |                                                                |               |                |         |            |                             |          |                                 |
| Richards 2018                                             | NVH                            | 66                |                                                                |               |                |         |            |                             |          |                                 |
| Richards 2018                                             | VH                             | 67                |                                                                |               | -              |         |            |                             |          |                                 |
| Murphy                                                    | VH <sup>b</sup>                | 47                |                                                                |               |                |         |            |                             |          |                                 |
| Neider                                                    | NVH                            |                   |                                                                | 57-60         | 6-11           | 20-25   |            |                             | 36       |                                 |
| <b>Performed within 90 days</b>                           |                                |                   |                                                                |               |                |         |            |                             |          |                                 |
| Richards 2018                                             | NVH                            | 66                |                                                                |               |                |         |            |                             |          |                                 |
| Richards 2018                                             | VH                             | 47                |                                                                |               |                |         |            |                             |          |                                 |
| Neider                                                    | VH                             |                   |                                                                | 40-56         | 5-13           | 38-41   |            |                             | 69-77    |                                 |
| <b>Performed within 180 days</b>                          |                                |                   |                                                                |               |                |         |            |                             |          |                                 |
| Bassett                                                   | NVH                            | 65                |                                                                |               |                |         |            | 14                          | 23       |                                 |
| Matulewicz                                                | NVH                            |                   |                                                                |               |                | 14.3    | 8.9        | 5.1                         |          |                                 |
| Ark                                                       | Either                         | 54                |                                                                |               |                | 44      | 20         | 18                          | 35       |                                 |
| Shinagare                                                 | Either                         | 36                |                                                                |               | 43             | 76      | 35         | 64                          |          | 36 <sup>c</sup>                 |
| Friedlander                                               | Either                         |                   |                                                                |               |                | 13.9    | 13.7       | 5.7                         |          |                                 |
| <b>Performed within 365 days</b>                          |                                |                   |                                                                |               |                |         |            |                             |          |                                 |
| Matulewicz                                                | NVH                            |                   |                                                                |               |                | 16.5    | 9.8        | 5.9                         |          |                                 |
| <b>Performed within unspecified timescale (1-3 years)</b> |                                |                   |                                                                |               |                |         |            |                             |          |                                 |
| Elias                                                     | NVH                            | 42                |                                                                | 15            | 10             | 23      |            |                             | 21       |                                 |
| Buteau                                                    | Either                         | 16                |                                                                | 63            | 7.3            |         |            |                             |          |                                 |
| Bradley                                                   | NVH                            |                   | 63                                                             | 25            |                |         |            |                             |          | 89 <sup>d</sup>                 |

|                   |     |  |    |    |     |     |     |  |  |
|-------------------|-----|--|----|----|-----|-----|-----|--|--|
| (secondary care)  |     |  |    |    |     |     |     |  |  |
| <b>Buteau</b>     | NVH |  | 59 | 5  | 34  | 6   | 5   |  |  |
| <b>Buteau</b>     | VH  |  | 84 | 20 | 42  | 26  | 25  |  |  |
| <b>Matulewicz</b> | NVH |  |    |    | 6.2 | 3.0 | 2.5 |  |  |

\* NVH: non-visible hematuria; VH: visible hematuria

<sup>†</sup> Murphy included patients with 50 red blood cell per high power field (RBC/HPF), equivalent to very high risk and VH group

Definition of guideline concordant evaluation:

<sup>‡</sup> Shinagare: upper renal tract imaging, urine cytology and cystoscopy for high risk patients and 1 urinalysis with >3 RBC/HPF; or upper renal tract imaging followed by either urine cytology or cystoscopy for patients with no risk factors and 2 of 3 urinalysis with >3RBC/HPF.

<sup>§</sup> Bradley: cystoscopy and upper tract imaging using CT urography
